# Supplementary material
Source: publisher figshare collection journal article supplement (https://karger.figshare.com/ndownloader/files/27686664)
Supplement: Supplementary file 1 [file 27686664]

**Supplementary table S2.**

**Top 10 hub genes screened by MCC method in network string interactions**

| **Rank** | **Gene symbol** | **MCC Score** |
| --- | --- | --- |
| 1 | LUM | 186 |
| 2 | ELN | 160 |
| 3 | FBLN1 | 152 |
| 4 | MMP2 | 147 |
| 5 | FBLN5 | 144 |
| 6 | FMOD | 140 |
| 7 | MFAP4 | 26 |
| 8 | THBS2 | 17 |
| 9 | COL14A1 | 16 |
| 10 | COMP | 14 |

MCC: Maximal Clique Centrality.
